# Supplementary material for: Surface-passivated MAPbBr3 microwire with enhanced stability and suppressed ion migration
Source: Royal Society of Chemistry journal article supplement (doi:10.1039/d3tc00379e), 2023-01-01
Supplement: d3tc00379e1.pdf [file d3tc00379e1.pdf]

## Supporting Information

### Figures

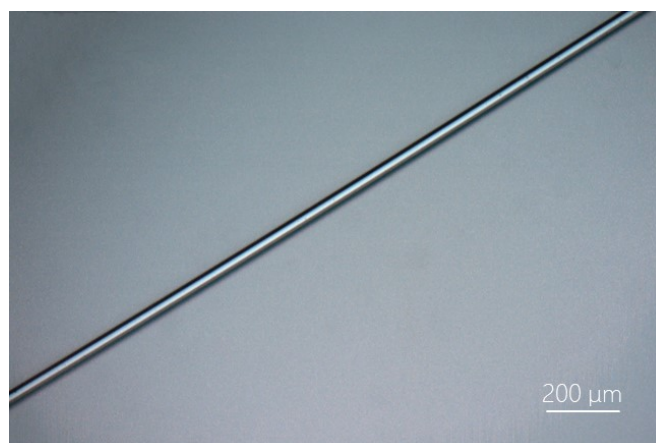

**Figure S1.** Optical microscope image of PbBr<sub>2</sub> microwire, with a diameter of 30 μm.

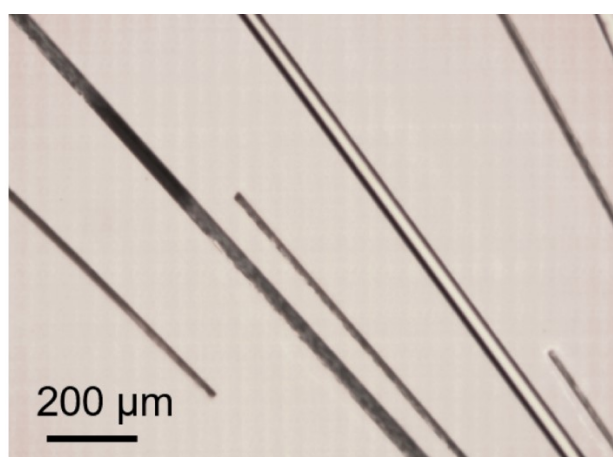

**Figure S2.** Optical microscope image indicating the homogeneity of PbBr<sub>2</sub> microwires.

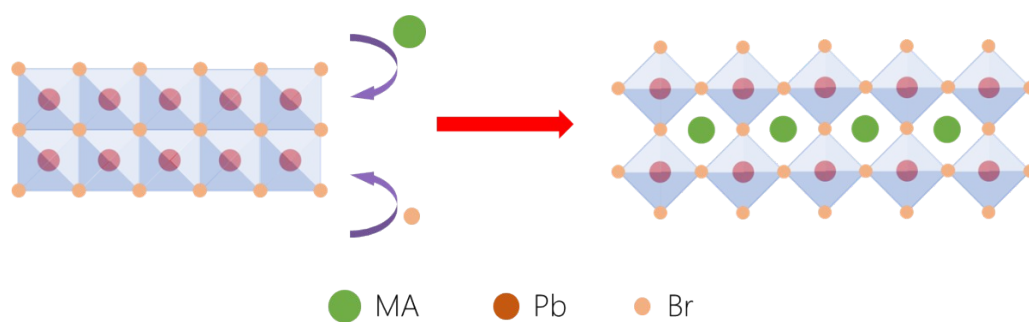

**Figure S3.** Schematic diagram of the formation process from PbBr<sub>2</sub> to MAPbBr<sub>3</sub>.

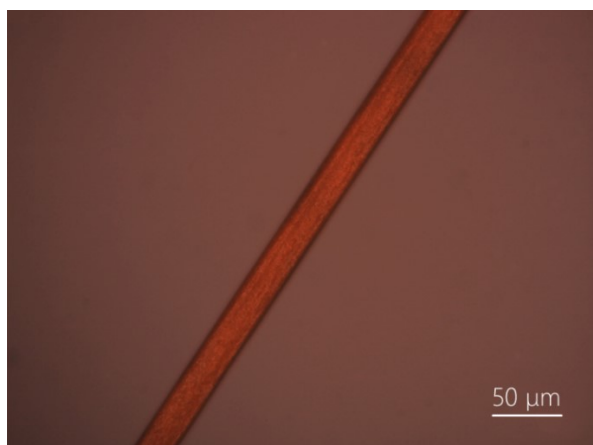

**Figure S4.** Optical microscope image of the prepared MAPbBr<sub>3</sub> microwire.

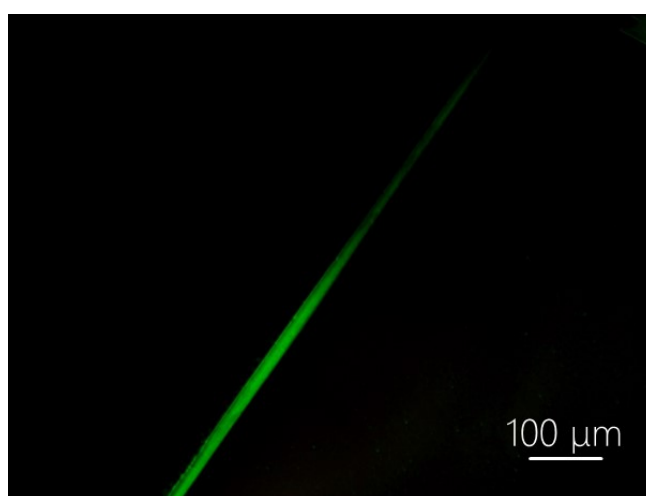

**Figure S5.** Optical microscope image of the prepared MAPbBr<sub>3</sub> microwire, under excitation of 266 nm, exhibiting an uniform luminescence.

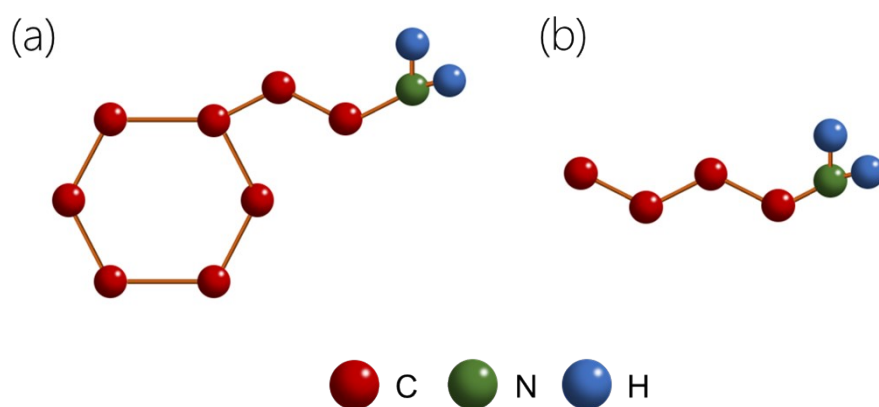

**Figure S6.** Schematic diagram of the molecular structure of (a) PEABr and (b) BABr.

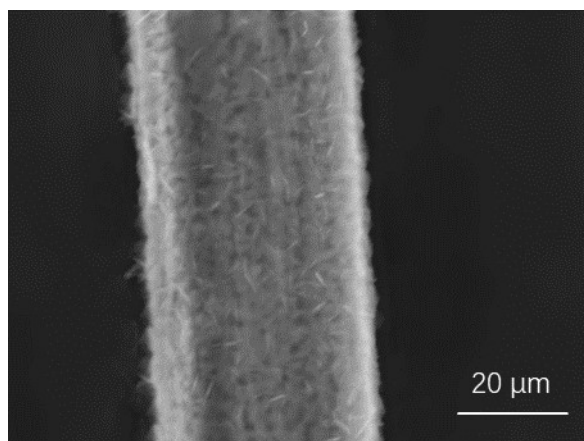

**Figure S7.** SEM image of the BA passivated microwire, the scale bar is 20  $\mu\text{m}$ .

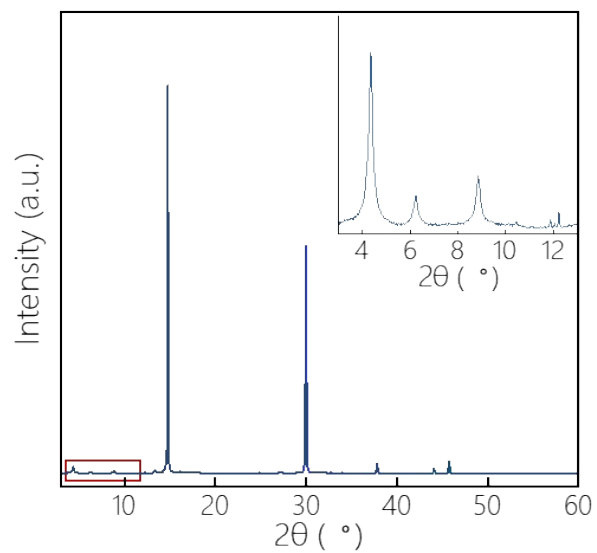

**Figure S8.** XRD pattern of the BA passivated microwire, the top right pattern is the zoom in of  $2\theta$  from 4° to 10°.

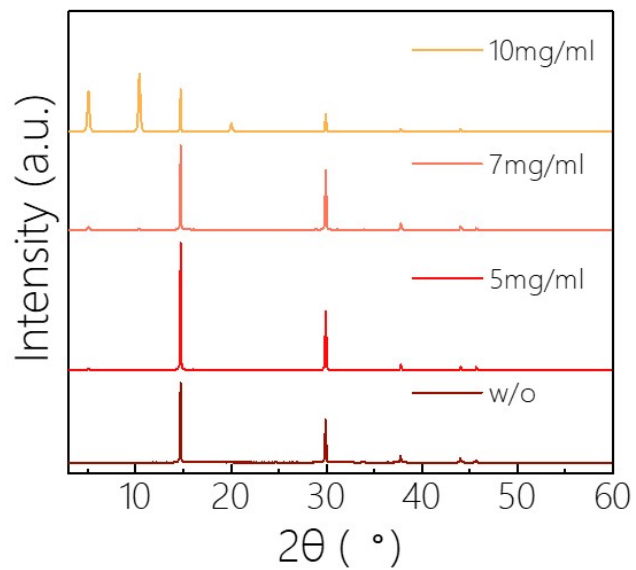

**Figure S9.** XRD patterns of the PEA passivated microwire with different PEABr concentration.

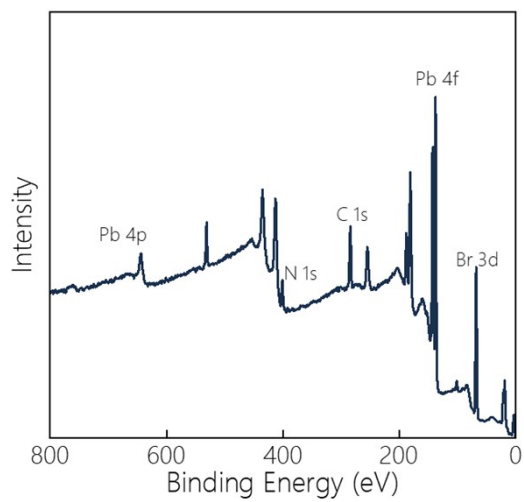

**Figure S10.** Survey spectra of X-ray photoelectron spectroscopy (XPS) of MAPbBr<sub>3</sub> microwire.

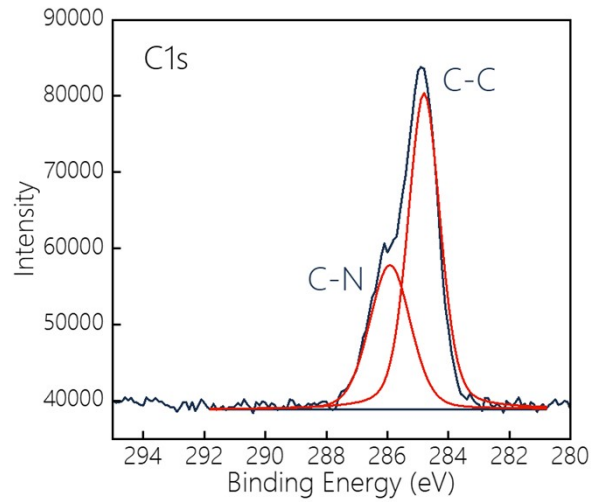

**Figure S11.** C1s XPS spectra of BA passivated microwire.

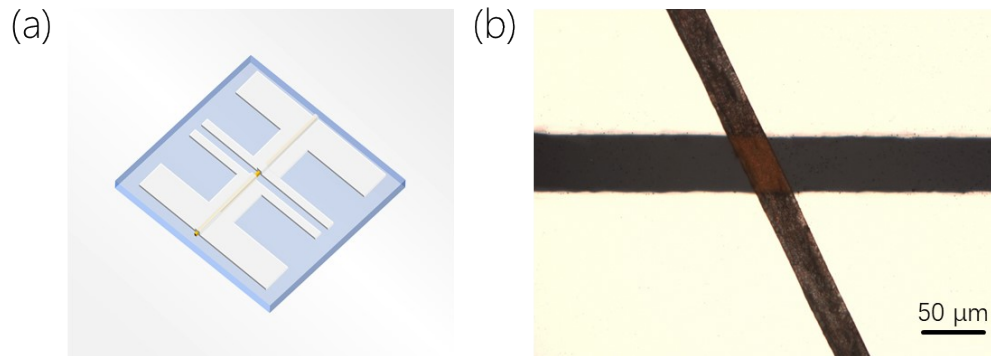

**Figure S12.** (a) Schematic diagram of the microwire-based device. (b) Optical microscope image of the microwire-based device.

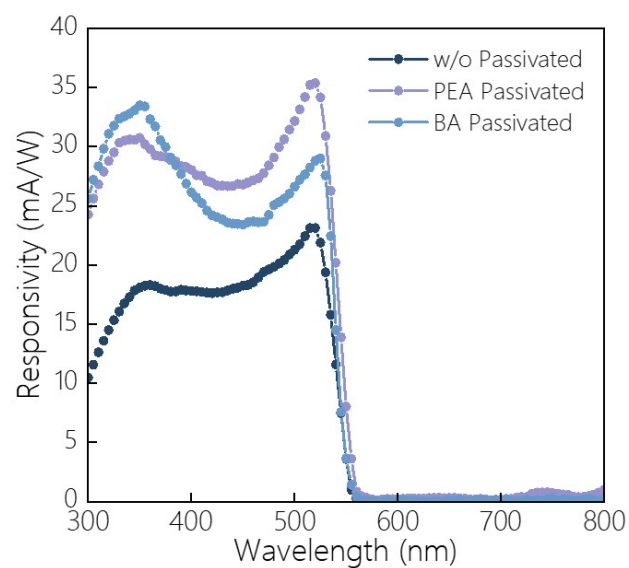

**Figure S13.** Responsivity curves of the three detectors, an obvious improvement can be observed after the passivation.

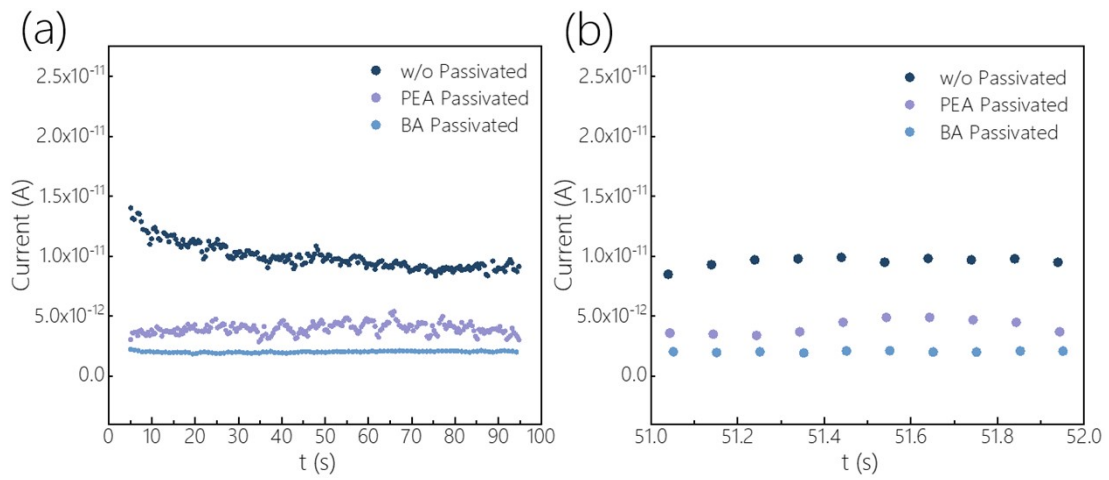

**Figure S14.** (a) Dark currents of the three devices; (b) Enlarged data of dark currents, indicating a sampling rate of 10 Hz.

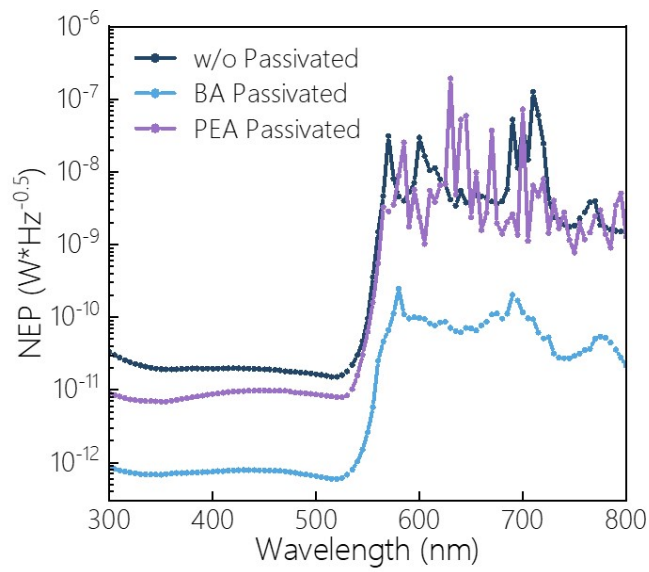

**Figure S15.** NEP (Noise Equivalent Power) curves of the three devices.

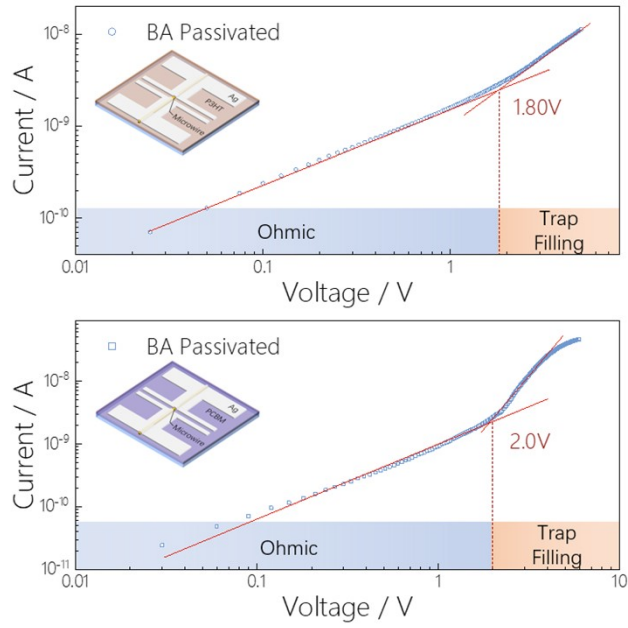

**Figure S16.** I-V curves of electron-only (above) and hole-only (below) devices based on BA passivated microwire, in logarithmic form. Inserted is the schematic diagram of the corresponding device structure;

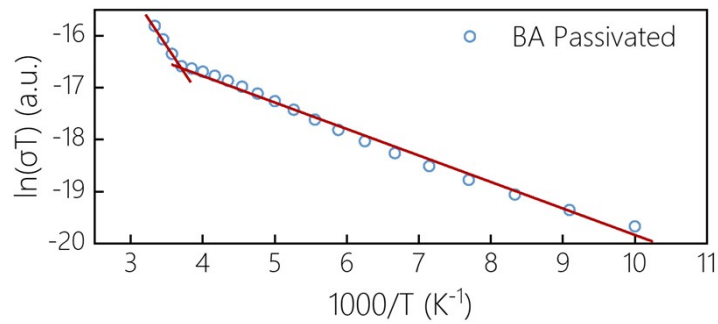

**Figure S17.** Arrhenius plot of the conductivity of BA passivated microwire devices.

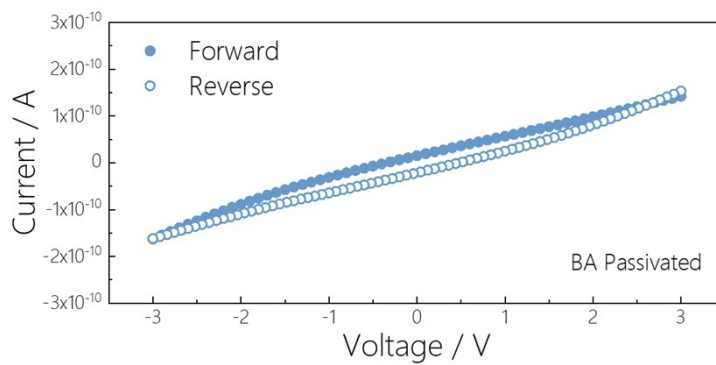

**Figure S18.** I-V curves of BA passivated microwire devices, the solid balls represent

forward scanning and the hollow balls represent reverse scanning.

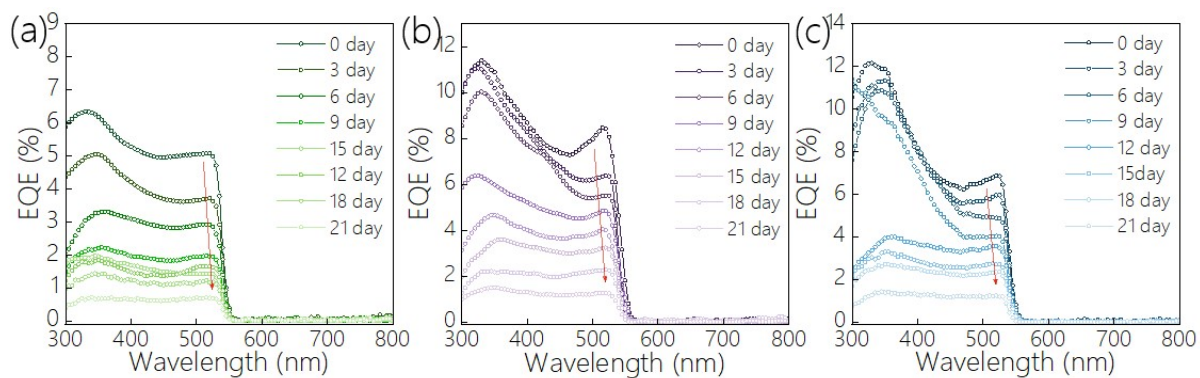

**Figure S19.** Changes of EQE curves of (a) w/o passivated device, (b) PEA passivated device and (c) BA passivated device within 21 days.
